# Supplementary material for: Inter- and intraspecific diversity in bacterial communities associated with two crustose coralline algae from the NW Mediterranean Sea
Source: Springer Nature journal article supplement (doi:10.1007/s00338-024-02605-6), 2025-01-03
Supplement: MOESM1 [file 338_2024_2605_MOESM1_ESM.docx]

**Inter- and intraspecific diversity in bacterial communities associated with two crustose coralline algae from the NW Mediterranean Sea**

Manea, E.1*, Bramanti, L.1, Pezzolesi2,3, L., Falace, A.4, Kaleb, S.4,Bongiorni, L.5, Galand, P.E.1

1Laboratoire d’Ecogeochimie des Environnements Benthiques, LECOB, Observatoire Océanologique de Banyuls sur Mer Centre National de la Recherche Scientifique (CNRS)-Sorbonne Université, Banyuls sur Mer, France

2Department of Biological, Geological and Environmental Sciences (BiGeA), University of Bologna, Via Sant’Alberto 163, 48123 Ravenna, Italy

3Interdepartmental Centre for Industrial Research in Renewable Resources, Environment, Sea and Energy (CIRI-FRAME), University of Bologna, Via Sant’Alberto 163, 48123 Ravenna, Italy

4Department of Life Sciences, University of Trieste, Via Licio Giorgieri 10, 34127 Trieste, Italy

5Institute of Marine Sciences, National Research Council, CNR-ISMAR, Arsenale, Tesa 104, Castello 2737/F, 30122, Venice, Italy

*Corresponding author: [elisabetta.manea@obs-banyuls.fr](mailto:elisabetta.manea@obs-banyuls.fr)

**Supplementary figures**


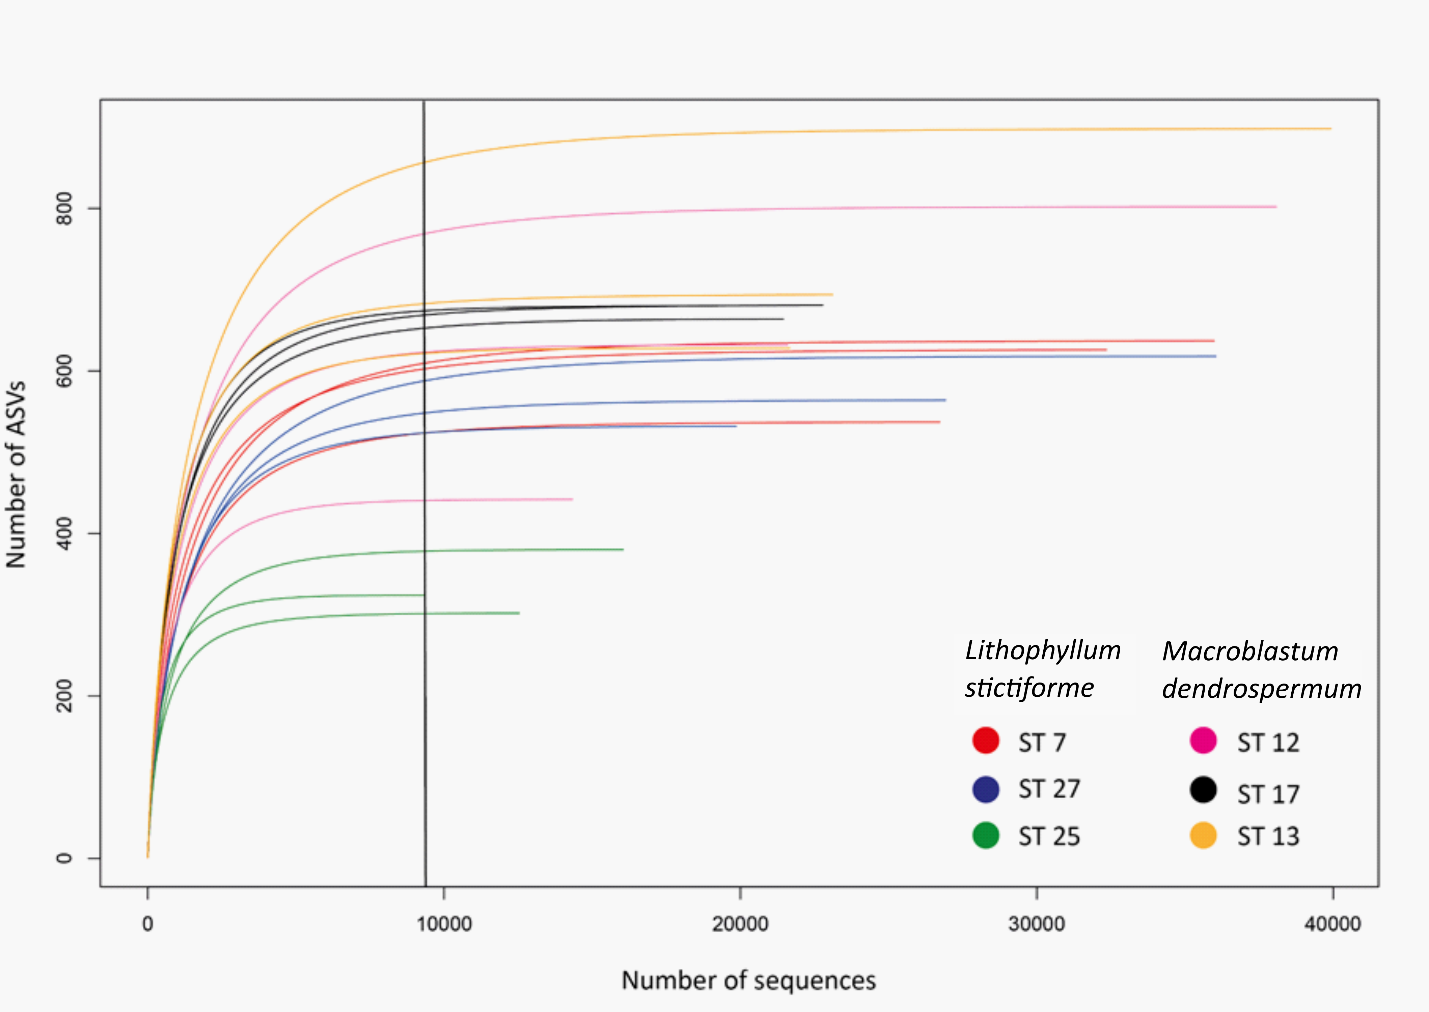


**Supp. Fig. 1** Rarefaction curves of the bacterial community sequencing data associated with the CCA samples of this study, rarefaction set at 9310 sequences. Replicates of each CCA sample are colored by site of collection.

**
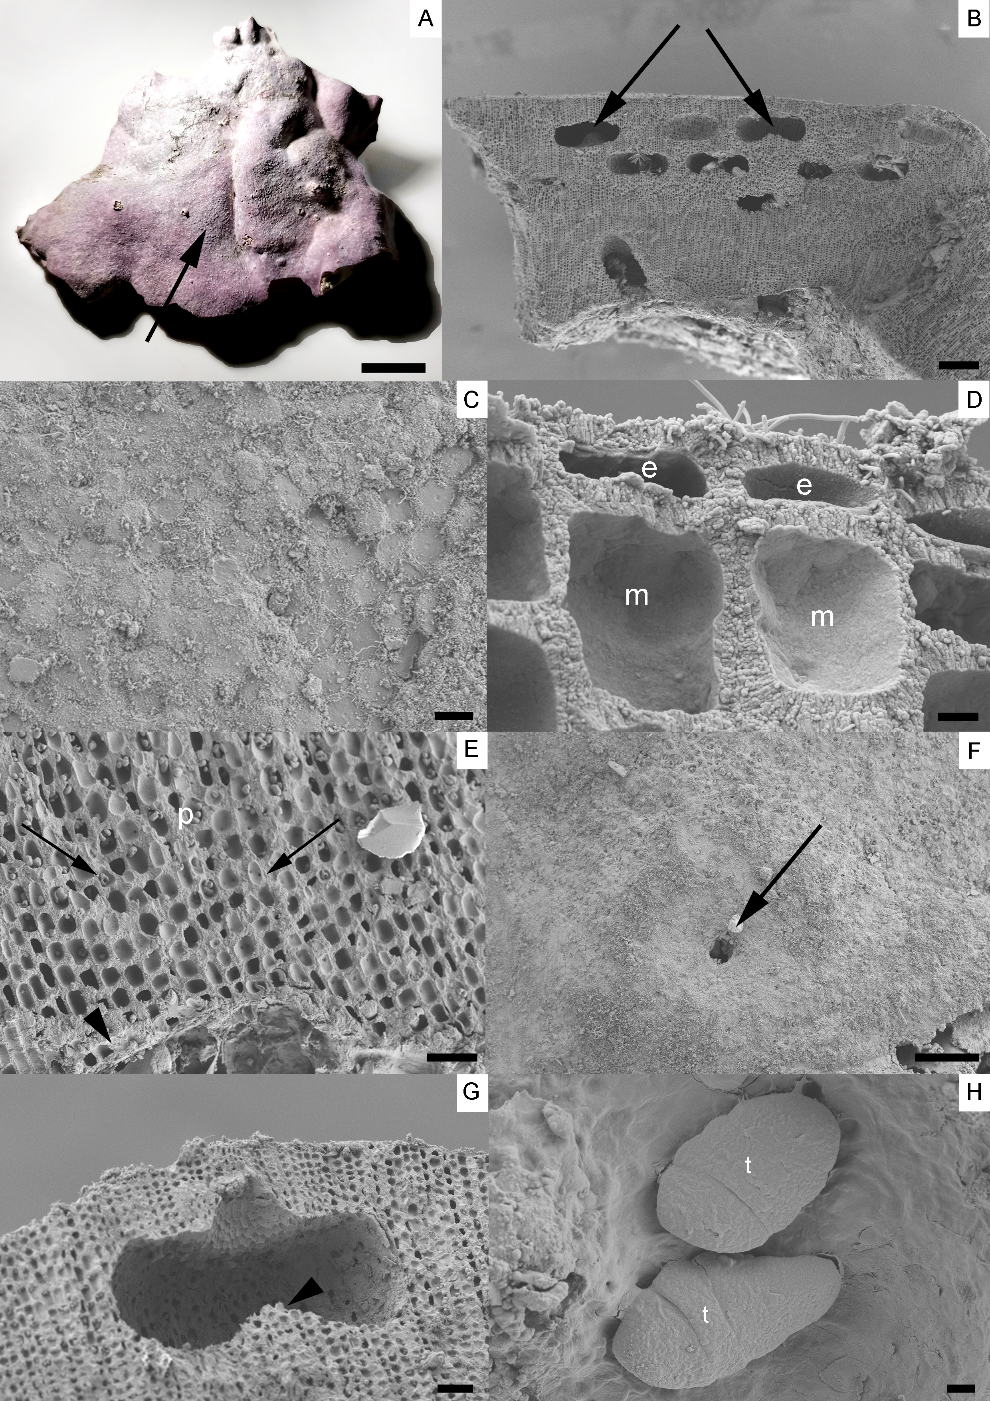
**

**Supp. Fig. 2** *Lithophyllum stictiforme* samples. **A.** Specimen with flat surface and uniporate conceptacles (arrow). Scale bar = 1 cm. **B.** Longitudinal section of a thallus with old buried dumbbell-shaped conceptacles (arrows). Scale bar = 200 µm. **C.** Epithallial cells (e) with slightly convex distal cell wall and rectangular meristematic cells (m). Scale bar = 2 µm. **D.** Peripheral filaments with cells joined laterally by secondary pit connections (arrows) and monostromatic ventral region (arrowhead). Scale bar = 30 µm. **E.** Slightly protruding uniporate conceptacle in surface (arrow). Scale bar = 100 µm. **F.** Section through a tetrasporangial conceptacle with a prominent central columella (arrowhead). Scale bar = 40 µm. **G.** Detail of tetrasporangia (t) lying on the wall of a conceptacle. Scale bar = 10 µm. H. Abraded epithallus in surface view. The cells are not easily distinguishable. Scale bar = 5 µm.


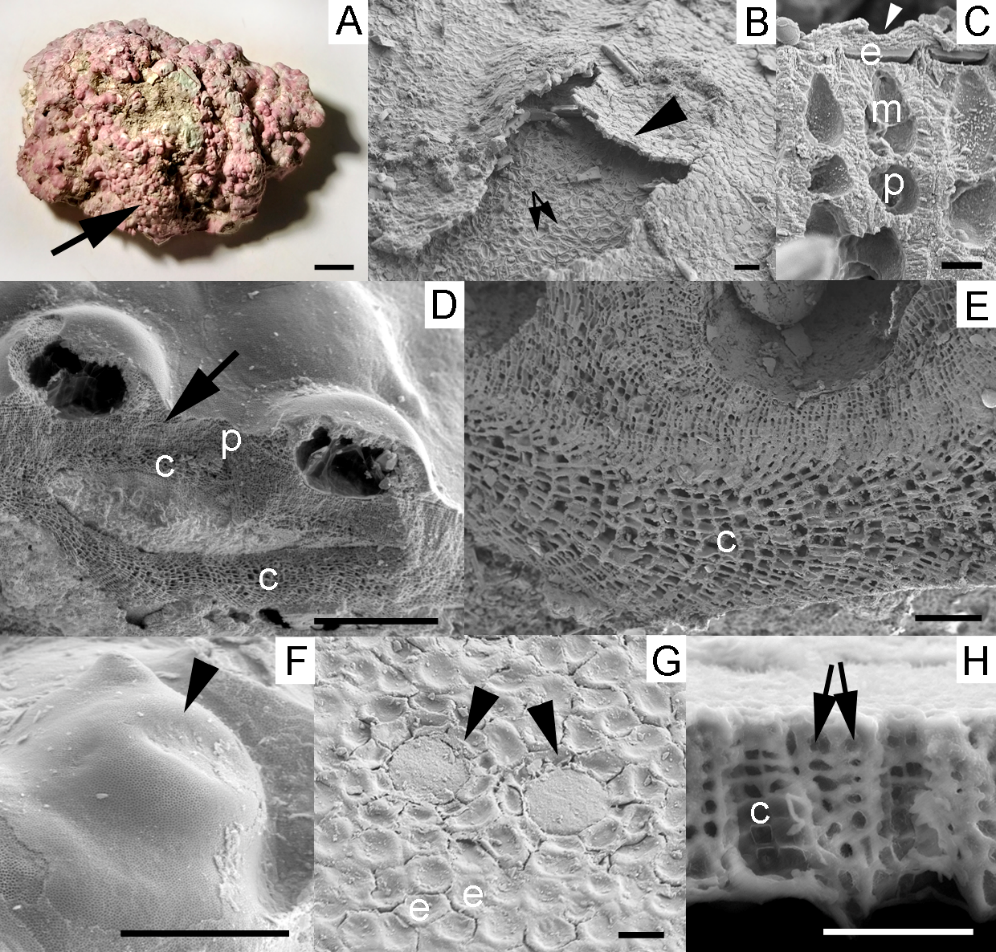


**Supp. Fig. 3** *Macroblastum dendrospermum*. Specimenwith encrusting to warty growth form and grouped multiporate conceptacles. Scale bar = 5 mm. **B.** Epitallus in surface view. Note flared epithallial cells (arrows) and a large area with shedding epithallial cells (arrowhead). Scale bar = 20 µm. **C.** Section with a flared epithalial cell (e) subtended by a meristematic cell (m) longer than the subtending peripheral cell (p). Scale bar = 4 µm. **D.** Section of a thallus with multiporate conceptacles protruding above the thallus surface, with the chamber floor 10-12 cells deep into the peripheral region (p), and not in contact with the core (c). Scale bar = 500 µm. **E.** Detail of the coaxial core (c) with cells of adjacent filaments aligned in arching tiers. Scale bar = 100 µm. **F.** A multiporate conceptacle with a rim (arrowhead) and a slightly sunken pore plate. Scale bar = 500 µm. **G.** Surface view of a conceptacle showing pores bordered by cells (arrowheads) smaller than the other epithallial roof cells (e). Scale bar = 300 µm. **H.** Section of a conceptacle roof plate showing the cells (c) lining the pore canals. In the central and basal part of the pore canal the lining cells are square and larger than the other plate cells


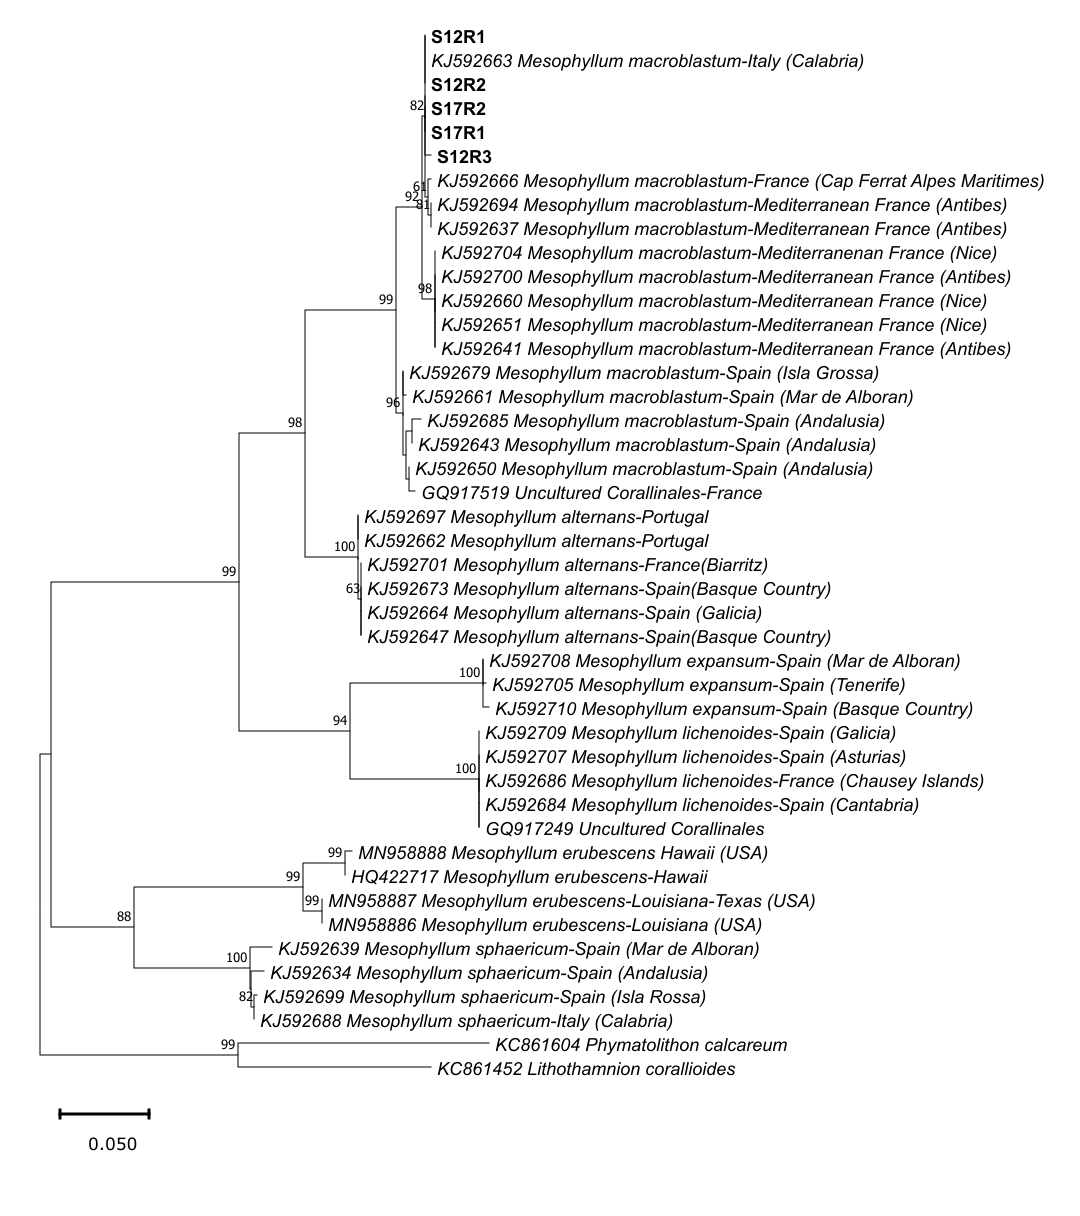


**Supp. Fig. 4** *Macroblastum dendrospermum* phylogenetic tree of the COI-5P sequences. Maximum likelihood tree inferred from the DNA barcode sequences (COI-5P) of *Macroblastum dendrospermum* (previously as *Mesophyllum macroblastum*) samples from stations S12 (R1-R3) and S17 (R1-R2), and other publicly available sequences for this genus. Bootstrap values > 60% between the species of *Mesophyllum* are shown for each node. Members of the subfamily Melobesioideae were used as outgroup. Scale bar: 0.05 substitutions per site. Sequences generated in the present work are marked in bold


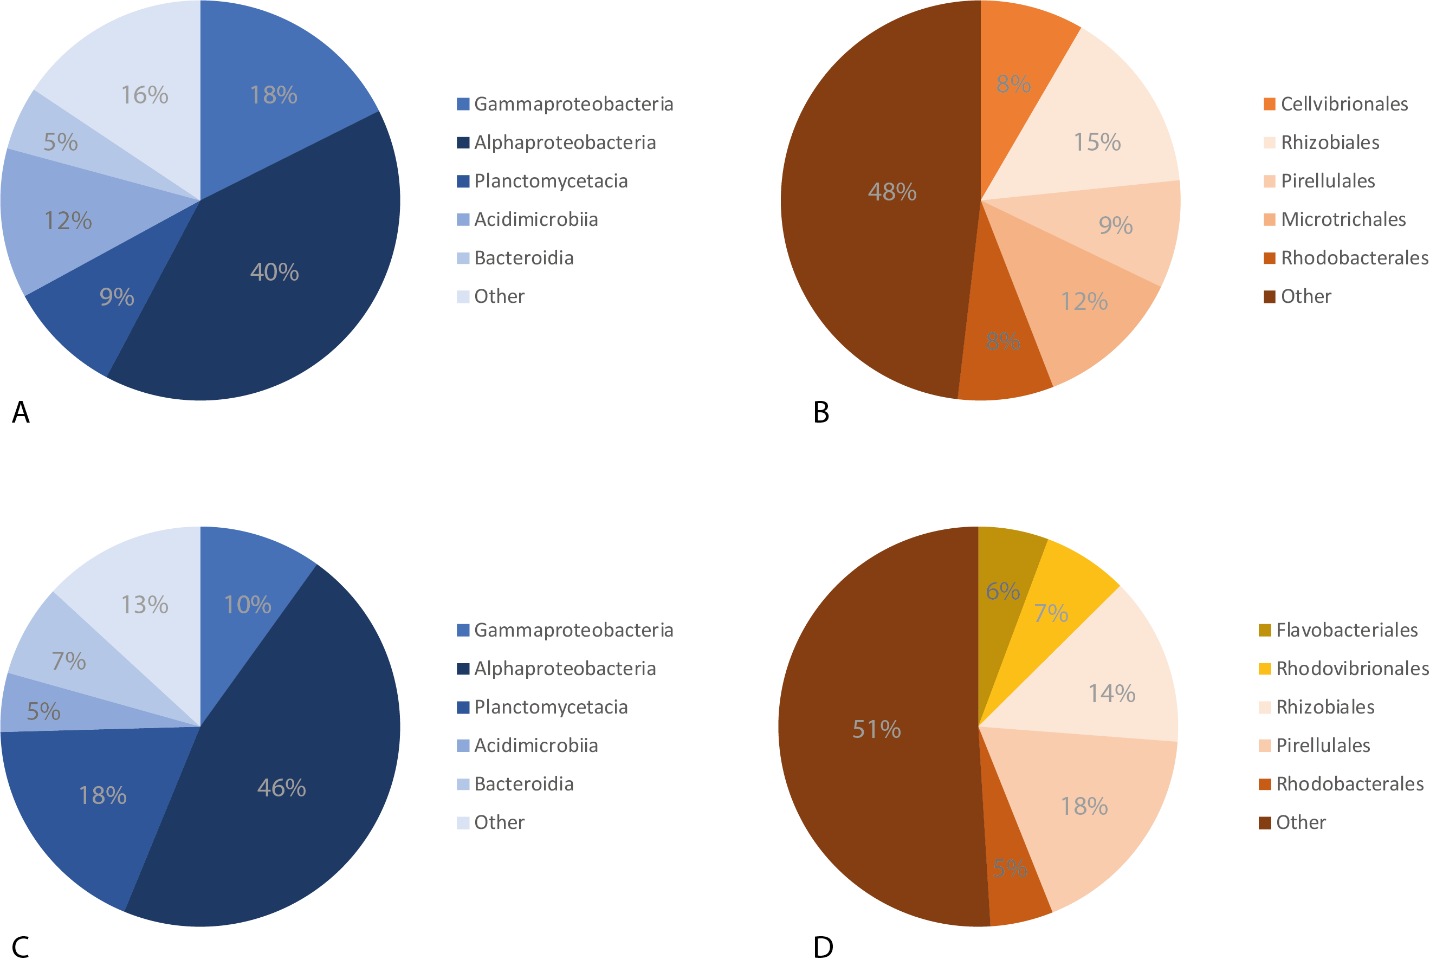


**Supp. Fig. 5** Average relative abundance of the five dominant bacterial classes and orders associated with each CCA species. **A.** Dominant bacteria classes and **B.** orders found in *Lithophyllum stictiforme* individuals; **C.** dominant bacteria classes and **D.** orders found in *Macroblastum dendrospermum* individuals.

**
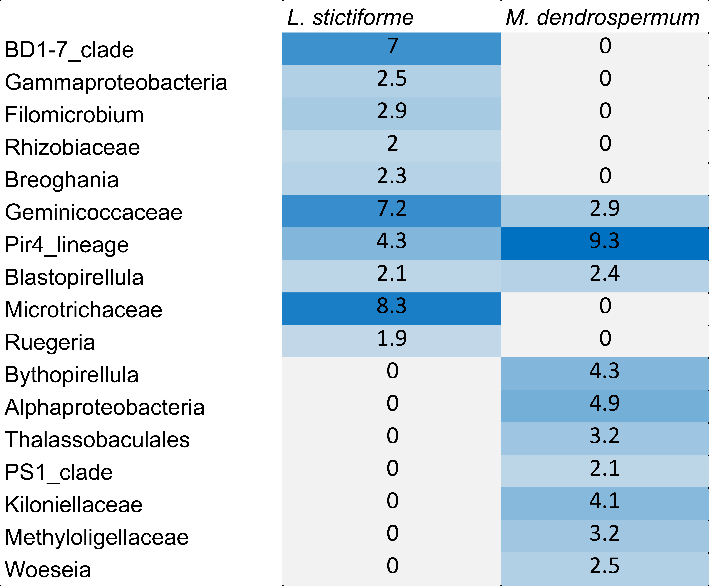
**

**Supp. Fig. 6.** Most abundant CCA bacteria genera. Percentage contribution of the 10 most abundant bacteria genera associated to *Lithophyllum stictiforme* and *Macroblastum dendrospermum*

**Supplementary Tables**

Table S1 - Mean genetic distances (Kimura-2 parameter) between individuals from the different clades of *L. stictiforme* for the psbA marker.

|  | **C3** | **clade_1** | **clade_10** | **clade_11** | **clade_12** | **clade_13** | **clade_2** | **clade_3A** | **clade_3B** | **clade_4** | **clade_5** | **clade_6** | **clade_7** | **clade_8** | **clade_9** | **outgroup** |
| --- | --- | --- | --- | --- | --- | --- | --- | --- | --- | --- | --- | --- | --- | --- | --- | --- |
| **C3** |  |  |  |  |  |  |  |  |  |  |  |  |  |  |  |  |
| **clade_1** | 0.046 |  |  |  |  |  |  |  |  |  |  |  |  |  |  |  |
| **clade_10** | 0.036 | 0.060 |  |  |  |  |  |  |  |  |  |  |  |  |  |  |
| **clade_11** | 0.026 | 0.057 | 0.015 |  |  |  |  |  |  |  |  |  |  |  |  |  |
| **clade_12** | 0.053 | 0.060 | 0.021 | 0.036 |  |  |  |  |  |  |  |  |  |  |  |  |
| **clade_13** | 0.036 | 0.035 | 0.042 | 0.042 | 0.053 |  |  |  |  |  |  |  |  |  |  |  |
| **clade_2** | 0.036 | 0.067 | 0.020 | 0.014 | 0.041 | 0.047 |  |  |  |  |  |  |  |  |  |  |
| **clade_3A** | 0.020 | 0.050 | 0.044 | 0.028 | 0.052 | 0.038 | 0.042 |  |  |  |  |  |  |  |  |  |
| **clade_3B** | 0.018 | 0.048 | 0.042 | 0.026 | 0.050 | 0.036 | 0.041 | 0.002 |  |  |  |  |  |  |  |  |
| **clade_4** | 0.029 | 0.055 | 0.054 | 0.037 | 0.065 | 0.048 | 0.052 | 0.018 | 0.016 |  |  |  |  |  |  |  |
| **clade_5** | 0.018 | 0.054 | 0.043 | 0.032 | 0.054 | 0.038 | 0.037 | 0.018 | 0.018 | 0.029 |  |  |  |  |  |  |
| **clade_6** | 0.031 | 0.046 | 0.050 | 0.034 | 0.061 | 0.050 | 0.049 | 0.020 | 0.018 | 0.016 | 0.031 |  |  |  |  |  |
| **clade_7** | 0.039 | 0.054 | 0.021 | 0.015 | 0.036 | 0.048 | 0.025 | 0.041 | 0.039 | 0.051 | 0.046 | 0.047 |  |  |  |  |
| **clade_8** | 0.032 | 0.055 | 0.017 | 0.006 | 0.035 | 0.041 | 0.015 | 0.034 | 0.032 | 0.044 | 0.039 | 0.040 | 0.017 |  |  |  |
| **clade_9** | 0.034 | 0.054 | 0.013 | 0.008 | 0.034 | 0.039 | 0.017 | 0.036 | 0.034 | 0.040 | 0.041 | 0.036 | 0.013 | 0.009 |  |  |
| **outgroup** | 0.059 | 0.076 | 0.065 | 0.058 | 0.082 | 0.065 | 0.065 | 0.055 | 0.055 | 0.073 | 0.068 | 0.067 | 0.064 | 0.054 | 0.061 |  |

Table S2. Output of the Kruskal-Wallis test followed by the Dunn test for pairwise comparison carried out to test for differences in Shannon index values between bacterial communities associated to CCA thalli of the different species (*=p≤0.05, **=p≤0.01, ***=p≤0.001). Only significantly different sample pairs are reported.

| **CCA comparison** | **Source** | **df** | **chi-squared** | **p-value** | **Pair-wise test significantly different** | **p-value** |
| --- | --- | --- | --- | --- | --- | --- |
| BetweenCCAspecies | CCA | 1 | 11.558 | 0.0006748*** | ST13-ST25 | 0.0233* |
|  | Site | 5 | 14.871 | 0.01093* | ST13-ST27 | 0.0129* |
|  |  |  |  |  | ST17-ST27 | 0.0279* |

Table S3. Output of the One-Way ANOVA analysis followed by the Tukey test for pairwise comparison carried out to test for differences in Shannon index values between bacterial communities associated to CCA thalli of the same species (*=p≤0.05, **=p≤0.01, ***=p≤0.001).

| **CCA comparison** | **Source** | **df** | **SS** | **Pair-wise test** | **diff** | **lwr** | **upr** | **p adj** |
| --- | --- | --- | --- | --- | --- | --- | --- | --- |
| Between *L.stictiforme* thalli | Site | 2 | 1.0089287 | ST27-ST25 | -0.1819813 | -0.6213516 | 0.2573889 | 0.4596184 |
|  | Residual | 6 | 0.1845506 | ST7-ST25 | 0.60156 | 0.1621898 | 1.0409302 | 0.0134191* |
|  |  |  |  | ST7-ST27 | 0.7835413 | 0.3441711 | 1.2229116 | 0.0037494** |
| Between *M.dendrospermum* thalli | Site | 2 | 0.1692788 | ST13-ST12 | 0.3259093 | -0.1835391 | 0.8353578 | 0.2021973 |
|  | Residual | 6 | 0.2481159 | ST17-ST12 | 0.2335007 | -0.2759478 | 0.7429491 | 0.3957806 |
|  |  |  | ST17-ST13 | -0.0924087 | -0.6018571 | 0.4170398 | 0.8470814 |

Table S4. Output of the PERMANOVA analysis carried out on Bray Curtis matrix of Hellinger transformed ASV data to test for differences in composition of bacterial communities associated to CCA, both between CCA species and CCA thalli of the same species (*=p≤0.05, **=p≤0.01, ***=p≤0.001).

| **CCA comparison** | **Source** | **Df** | **SumsOfSqs** | **F.Model** | **R2** | **Pr(>F)** |
| --- | --- | --- | --- | --- | --- | --- |
| Between CCA species | Species | 1 | 2.297 | 9.8183 | 0.25962 | 0.001*** |
|  | Residuals | 28 | 6.5505 |  | 0.74038 |  |
|  | Total | 29 | 8.8475 |  | 1 |  |
| Between *L.stictiforme* thalli | Site | 2 | 1.00493 | 4.2224 | 0.58463 | 0.005** |
|  | Residuals | 6 | 0.71399 |  | 0.41537 |  |
|  | Total | 8 | 1.71892 |  | 1 |  |
| Between *M.dendrospermum* thalli | Site | 2 | 0.66932 | 3.1123 | 0.50918 | 0.002** |
|  | Residuals | 6 | 0.64518 |  | 0.49082 |  |
|  | Total | 8 | 1.31449 |  | 1 |  |

Table S5. Output of the pairwise comparison carried out on Bray Curtis matrix of Hellinger transformed ASV data to test for differences in composition of bacterial communities associated to CCA thalli of *L. stictiforme* complex.

| **CCA comparison** | **Source** | **df** | **Sites** | **SS** | **R2** | **F** | **Pr(>F)** |
| --- | --- | --- | --- | --- | --- | --- | --- |
| Between *L.stictiforme* thalli | Site | 1 | ST7-ST27 | 0.28664 | 0.3902 | 2.5595 | 0.1 |
|  | Residual | 4 |  | 0.44796 | 0.6098 |  |  |
|  | Total | 5 |  | 0.7346 | 1 |  |  |
|  |  |  | ST7-ST25 | 0.48368 | 0.51402 | 4.2309 | 0.1 |
|  |  |  |  | 0.45729 | 0.48598 |  |  |
|  |  |  |  | 0.94097 | 1 |  |  |
|  |  |  | ST27-ST25 | 0.31836 | 0.39407 | 2.6014 | 0.1 |
|  |  |  |  | 0.48951 | 0.60593 |  |  |
|  |  |  |  | 0.80787 | 1 |  |  |

Table S6. Output of the pairwise comparison carried out on Bray Curtis matrix of Hellinger transformed ASV data to test for differences in composition of bacterial communities associated to CCA thalli of *M. dendrospermum*.

| **CCA comparison** | **Source** | **df** | **Sites** | **SS** | **R2** | **F** | **Pr(>F)** |
| --- | --- | --- | --- | --- | --- | --- | --- |
| Between *M.dendrospermum* thalli | Site | 1 | ST12-ST17 | 0.20642 | 0.30635 | 1.7666 | 0.1 |
|  | Residual | 4 |  | 0.46739 | 0.69365 |  |  |
|  | Total | 5 |  | 0.67381 | 1 |  |  |
|  |  |  | ST12-ST13 | 0.35878 | 0.47628 | 3.6377 | 0.1 |
|  |  |  |  | 0.39451 | 0.52372 |  |  |
|  |  |  |  | 0.75329 | 1 |  |  |
|  |  |  | ST17-ST13 | 0.33128 | 0.46094 | 3.4204 | 0.1 |
|  |  |  |  | 0.38742 | 0.53906 |  |  |
|  |  |  |  | 0.71871 | 1 |  |  |

Table S7. Output of the differently abundance analysis carried out with DESeq2 analyses between bacteria ASVs associated with the two CCA species (adjusted *p*-value  ≤ 0.01).

| ASV | baseMean | log2FoldChange | lfcSE | stat | pvalue | padj | Family |
| --- | --- | --- | --- | --- | --- | --- | --- |
| 1 | 834.08 | -10.28 | 2.88 | -3.56 | 0.000364546 | 0.00352183 | Spongiibacteraceae |
| 7 | 146.56 | 10.68 | 1.42 | 7.50 | 6.36E-14 | 9.71E-12 | Pirellulaceae |
| 10 | 222.05 | 11.28 | 1.45 | 7.80 | 6.02E-15 | 1.12E-12 | Pirellulaceae |
| 16 | 227.05 | 11.31 | 1.53 | 7.40 | 1.35E-13 | 1.66E-11 | Alphaproteobacteria NA |
| 19 | 106.90 | -10.23 | 1.53 | -6.69 | 2.18E-11 | 2.01E-09 | Pirellulaceae |
| 21 | 179.40 | 7.84 | 1.61 | 4.87 | 1.11E-06 | 2.21E-05 | Rhodopirillaceae |
| 22 | 89.30 | -9.97 | 1.49 | -6.70 | 2.15E-11 | 2.01E-09 | Pirellulaceae |
| 27 | 86.57 | -9.92 | 2.14 | -4.64 | 3.55E-06 | 6.36E-05 | Rubritaleaceae |
| 30 | 112.48 | -10.30 | 1.54 | -6.67 | 2.59E-11 | 2.21E-09 | Rhodobacteraceae |
| 31 | 50.00 | 9.13 | 1.70 | 5.38 | 7.62E-08 | 2.17E-06 | Rhizobiales_Incertae_Sedis |
| 34 | 32.10 | 8.49 | 1.44 | 5.90 | 3.63E-09 | 1.75E-07 | Rhizobiaceae |
| 35 | 68.74 | -9.59 | 1.70 | -5.63 | 1.75E-08 | 6.29E-07 | Rubritaleaceae |
| 40 | 129.13 | 10.49 | 1.52 | 6.89 | 5.47E-12 | 6.08E-10 | Thalassobaculales NA |
| 41 | 35.58 | 8.63 | 1.44 | 5.99 | 2.11E-09 | 1.17E-07 | Rhodobacteraceae |
| 45 | 17.57 | 7.62 | 2.03 | 3.74 | 0.000181571 | 0.00205842 | Flavobacteriaceae |
| 49 | 54.04 | -9.24 | 1.80 | -5.15 | 2.65E-07 | 6.12E-06 | Flavobacteriaceae |
| 54 | 46.88 | -9.04 | 1.58 | -5.74 | 9.54E-09 | 4.24E-07 | Thiohalorhabdaceae |
| 55 | 51.41 | -9.17 | 2.13 | -4.30 | 1.74E-05 | 0.000271591 | Rubritaleaceae |
| 56 | 50.85 | -9.16 | 1.68 | -5.45 | 4.90E-08 | 1.51E-06 | Pirellulaceae |
| 57 | 67.85 | -9.57 | 1.54 | -6.22 | 4.88E-10 | 3.19E-08 | Pirellulaceae |
| 59 | 65.51 | -9.52 | 1.56 | -6.09 | 1.14E-09 | 6.68E-08 | Thalassobaculales NA |
| 63 | 26.94 | 8.23 | 1.46 | 5.65 | 1.57E-08 | 6.08E-07 | Pirellulaceae |
| 64 | 51.57 | 9.17 | 1.72 | 5.34 | 9.38E-08 | 2.54E-06 | Flavobacteriaceae |
| 67 | 52.97 | 9.21 | 1.45 | 6.33 | 2.38E-10 | 1.89E-08 | Pirellulaceae |
| 72 | 48.10 | 9.07 | 1.48 | 6.13 | 9.02E-10 | 5.56E-08 | Pirellulaceae |
| 73 | 46.67 | -9.03 | 1.54 | -5.88 | 4.01E-09 | 1.86E-07 | KI89A_clade NA |
| 78 | 28.07 | 8.29 | 1.53 | 5.43 | 5.69E-08 | 1.71E-06 | Rubritaleaceae |
| 79 | 49.72 | 9.12 | 1.46 | 6.22 | 4.82E-10 | 3.19E-08 | Pirellulaceae |
| 82 | 54.61 | -9.26 | 2.34 | -3.95 | 7.75E-05 | 0.00096683 | Phormidiaceae |
| 86 | 46.10 | -9.01 | 1.52 | -5.92 | 3.13E-09 | 1.62E-07 | Rhodobacteraceae |
| 87 | 38.76 | -8.77 | 1.74 | -5.04 | 4.59E-07 | 1.01E-05 | Flavobacteriaceae |
| 88 | 82.56 | 5.65 | 1.51 | 3.73 | 0.00019041 | 0.00211545 | Pirellulaceae |
| 92 | 15.21 | 7.41 | 1.86 | 3.98 | 6.89E-05 | 0.000888708 | Rubritaleaceae |
| 100 | 31.63 | -24.08 | 2.52 | -9.55 | 1.34E-21 | 1.49E-18 | Flavobacteriaceae |
| 101 | 85.76 | 24.77 | 2.83 | 8.74 | 2.35E-18 | 8.71E-16 | Flavobacteriaceae |
| 102 | 40.95 | -8.84 | 2.30 | -3.85 | 0.000119545 | 0.001428111 | Nodosilineaceae |
| 104 | 6.65 | 6.22 | 1.84 | 3.38 | 0.000727314 | 0.006362568 | Arenicellaceae |
| 107 | 35.62 | -8.64 | 1.91 | -4.53 | 5.96E-06 | 0.000101862 | Rubritaleaceae |
| 108 | 66.35 | 9.53 | 1.69 | 5.65 | 1.64E-08 | 6.08E-07 | Parvularculaceae |
| 110 | 29.97 | 8.39 | 1.66 | 5.06 | 4.26E-07 | 9.66E-06 | Pirellulaceae |
| 111 | 55.44 | 5.45 | 1.55 | 3.51 | 0.000445936 | 0.004094508 | Flavobacteriaceae |
| 113 | 26.30 | 8.20 | 1.50 | 5.47 | 4.56E-08 | 1.45E-06 | Rhodobacteraceae |
| 114 | 43.29 | 8.92 | 1.71 | 5.21 | 1.93E-07 | 4.77E-06 | Flavobacteriaceae |
| 115 | 50.91 | 9.15 | 1.45 | 6.30 | 3.06E-10 | 2.27E-08 | Thalassobaculales NA |
| 120 | 20.25 | 7.82 | 1.66 | 4.70 | 2.57E-06 | 4.68E-05 | KI89A_clade NA |
| 128 | 13.41 | 7.23 | 1.67 | 4.33 | 1.51E-05 | 0.000239937 | Rhizobiaceae |
| 129 | 31.53 | -8.47 | 2.06 | -4.11 | 3.91E-05 | 0.000536862 | Rhodobacteraceae |
| 130 | 26.54 | 8.21 | 1.48 | 5.54 | 2.95E-08 | 9.63E-07 | Pirellulaceae |
| 134 | 29.68 | 8.37 | 1.55 | 5.41 | 6.31E-08 | 1.85E-06 | Woeseiaceae |
| 136 | 24.17 | 8.08 | 1.44 | 5.61 | 2.07E-08 | 7.09E-07 | Hyphomicrobiaceae |
| 137 | 18.68 | 7.70 | 1.48 | 5.21 | 1.90E-07 | 4.77E-06 | Pirellulaceae |
| 145 | 24.33 | -8.09 | 1.71 | -4.72 | 2.34E-06 | 4.40E-05 | Phycisphaeraceae |
| 151 | 56.02 | -9.30 | 1.91 | -4.87 | 1.11E-06 | 2.21E-05 | Microtrichaceae |
| 154 | 33.74 | 8.56 | 1.73 | 4.94 | 7.75E-07 | 1.63E-05 | Rhodobacteraceae |
| 158 | 14.59 | 7.35 | 1.46 | 5.04 | 4.64E-07 | 1.01E-05 | Pirellulaceae |
| 159 | 29.49 | -8.37 | 2.30 | -3.65 | 0.000265584 | 0.002783617 | Ilumatobacteraceae |
| 160 | 23.36 | 8.03 | 1.68 | 4.79 | 1.70E-06 | 3.26E-05 | KI89A_clade NA |
| 166 | 14.40 | 22.21 | 2.97 | 7.49 | 6.99E-14 | 9.71E-12 | Pirellulaceae |
| 168 | 25.83 | 8.17 | 1.45 | 5.65 | 1.63E-08 | 6.08E-07 | Pirellulaceae |
| 171 | 19.49 | -7.77 | 2.07 | -3.75 | 0.000177541 | 0.002033489 | Flavobacteriaceae |
| 178 | 23.17 | -8.02 | 2.10 | -3.82 | 0.000133194 | 0.001557675 | Woeseiaceae |
| 180 | 24.60 | -8.11 | 1.89 | -4.29 | 1.80E-05 | 0.000278284 | Thiohalorhabdaceae |
| 184 | 14.83 | 7.37 | 1.51 | 4.88 | 1.06E-06 | 2.17E-05 | Pirellulaceae |
| 186 | 20.34 | -7.84 | 1.70 | -4.61 | 4.10E-06 | 7.12E-05 | Pirellulaceae |
| 187 | 22.29 | -7.97 | 2.02 | -3.94 | 8.26E-05 | 0.001020128 | WN-HWB-116 NA |
| 191 | 12.44 | -7.13 | 1.67 | -4.28 | 1.90E-05 | 0.000289741 | Rubritaleaceae |
| 192 | 33.42 | 8.54 | 2.07 | 4.12 | 3.80E-05 | 0.000528053 | Pirellulaceae |
| 195 | 19.06 | -7.74 | 2.26 | -3.43 | 0.000596722 | 0.00530367 | Pirellulaceae |
| 203 | 27.22 | 8.25 | 1.47 | 5.60 | 2.10E-08 | 7.09E-07 | Geminicoccaceae |
| 205 | 8.71 | 6.61 | 2.02 | 3.28 | 0.001055103 | 0.00812078 | Phycisphaeraceae |
| 209 | 37.36 | 8.71 | 1.47 | 5.92 | 3.20E-09 | 1.62E-07 | Rhizobiales_Incertae_Sedis |
| 210 | 19.03 | -7.74 | 1.85 | -4.19 | 2.82E-05 | 0.00041785 | Rhizobiaceae |
| 215 | 23.34 | -8.03 | 1.50 | -5.35 | 9.00E-08 | 2.50E-06 | Phycisphaeraceae |
| 219 | 18.44 | 7.69 | 1.86 | 4.13 | 3.61E-05 | 0.000508149 | Flavobacteriaceae |
| 220 | 30.57 | 8.42 | 2.51 | 3.35 | 0.000813356 | 0.006693622 | Thalassobaculales NA |
| 229 | 35.59 | 8.64 | 1.93 | 4.48 | 7.41E-06 | 0.000124749 | Woeseiaceae |
| 236 | 37.66 | 8.72 | 1.69 | 5.16 | 2.48E-07 | 5.96E-06 | Pirellulaceae |
| 238 | 33.41 | 8.54 | 2.34 | 3.65 | 0.000258522 | 0.002735413 | Pirellulaceae |
| 240 | 15.00 | 7.39 | 1.47 | 5.03 | 4.88E-07 | 1.04E-05 | Pirellulaceae |
| 241 | 32.99 | 8.53 | 1.49 | 5.71 | 1.15E-08 | 4.93E-07 | Pirellulaceae |
| 244 | 10.27 | 6.84 | 1.88 | 3.63 | 0.000281414 | 0.002868361 | Phormidesmiaceae |
| 248 | 36.68 | 8.68 | 2.32 | 3.74 | 0.000187312 | 0.002102057 | Pirellulaceae |
| 251 | 11.46 | -7.01 | 1.57 | -4.46 | 8.13E-06 | 0.000132846 | Hyphomonadaceae |
| 257 | 22.34 | -7.97 | 1.93 | -4.13 | 3.61E-05 | 0.000508149 | Flavobacteriaceae |
| 262 | 31.91 | 8.48 | 2.13 | 3.97 | 7.04E-05 | 0.000888708 | Thalassobaculales NA |
| 264 | 17.95 | -7.65 | 1.66 | -4.62 | 3.88E-06 | 6.84E-05 | PS1_clade |
| 275 | 29.32 | 8.36 | 2.32 | 3.60 | 0.000323975 | 0.003213715 | Blattabacteriaceae |
| 276 | 5.77 | 6.01 | 1.84 | 3.27 | 0.001059868 | 0.00812078 | Hyphomonadaceae |
| 278 | 17.12 | -7.59 | 2.26 | -3.35 | 0.000798999 | 0.006643842 | Rhodobacteraceae |
| 280 | 31.02 | 8.44 | 1.48 | 5.69 | 1.24E-08 | 5.11E-07 | Methyloligellaceae |
| 284 | 18.80 | -7.72 | 1.64 | -4.71 | 2.45E-06 | 4.53E-05 | HOC36 NA |
| 288 | 27.94 | 8.29 | 2.08 | 3.98 | 7.00E-05 | 0.000888708 | Hyphomicrobiaceae |
| 291 | 11.81 | 7.04 | 2.04 | 3.46 | 0.000547414 | 0.004904653 | Flavobacteriaceae |
| 295 | 15.29 | -7.42 | 1.68 | -4.43 | 9.35E-06 | 0.000150593 | Rhodobacteraceae |
| 301 | 28.38 | 23.23 | 2.54 | 9.14 | 6.18E-20 | 3.43E-17 | Pirellulaceae |
| 302 | 9.76 | -6.78 | 1.89 | -3.58 | 0.000338524 | 0.003328322 | Hyphomonadaceae |
| 310 | 17.50 | 7.61 | 1.45 | 5.24 | 1.61E-07 | 4.16E-06 | Alphaproteobacteria NA |
| 313 | 15.70 | -7.46 | 2.02 | -3.69 | 0.000223373 | 0.002433016 | Gammaproteobacteria NA |
| 314 | 23.92 | 8.06 | 2.11 | 3.82 | 0.000132142 | 0.001557675 | Thalassobaculales NA |
| 324 | 35.13 | -8.62 | 2.37 | -3.64 | 0.000275327 | 0.002832302 | Flavobacteriaceae |
| 328 | 29.01 | 8.34 | 1.57 | 5.31 | 1.10E-07 | 2.90E-06 | Kordiimonadaceae |
| 331 | 20.01 | 7.80 | 1.84 | 4.23 | 2.33E-05 | 0.000350375 | Pirellulaceae |
| 335 | 21.41 | 7.90 | 1.65 | 4.80 | 1.58E-06 | 3.08E-05 | Kiloniellaceae |
| 342 | 9.68 | 6.76 | 2.04 | 3.31 | 0.000941844 | 0.007421199 | Rhodobacteraceae |
| 344 | 8.09 | 6.50 | 1.83 | 3.55 | 0.000391 | 0.003681365 | Parvularculaceae |
| 346 | 24.47 | 8.09 | 2.28 | 3.56 | 0.000377098 | 0.003580821 | Kiloniellaceae |
| 356 | 23.20 | 8.02 | 2.07 | 3.87 | 0.000109222 | 0.001318969 | Flavobacteriaceae |
| 364 | 22.51 | 7.97 | 2.49 | 3.20 | 0.001364572 | 0.009973941 | Kiloniellaceae |
| 369 | 18.81 | 4.78 | 1.42 | 3.37 | 0.000748733 | 0.00644839 | Gammaproteobacteria NA |
| 371 | 13.70 | -22.94 | 2.71 | -8.48 | 2.28E-17 | 6.33E-15 | Rhodobacteraceae |
| 380 | 16.75 | -7.56 | 2.25 | -3.36 | 0.000792806 | 0.006643842 | Pirellulaceae |
| 383 | 18.99 | 7.73 | 1.88 | 4.11 | 4.02E-05 | 0.000544827 | Cellvibrionales NA |
| 406 | 9.63 | 6.75 | 2.03 | 3.32 | 0.000906371 | 0.007244446 | Flavobacteriaceae |
| 415 | 16.60 | 7.54 | 2.06 | 3.66 | 0.000248993 | 0.002685745 | Flavobacteriaceae |
| 418 | 27.41 | -8.26 | 2.54 | -3.25 | 0.001158608 | 0.008756555 | SAR116_clade |
| 421 | 10.77 | -6.92 | 2.06 | -3.35 | 0.000801328 | 0.006643842 | Acaryochloridaceae |
| 432 | 13.46 | 7.23 | 2.25 | 3.21 | 0.00130572 | 0.009801721 | Flavobacteriaceae |
| 433 | 18.31 | 7.68 | 2.26 | 3.40 | 0.000681579 | 0.0060098 | Alphaproteobacteria NA |
| 435 | 16.47 | 7.52 | 2.27 | 3.32 | 0.000900887 | 0.007244446 | Geminicoccaceae |
| 436 | 7.61 | -6.42 | 1.85 | -3.47 | 0.000526201 | 0.004752918 | Arenicellaceae |
| 438 | 19.44 | 6.73 | 2.00 | 3.37 | 0.000764824 | 0.006486412 | Pirellulaceae |
| 457 | 14.19 | 22.26 | 2.71 | 8.22 | 2.05E-16 | 4.55E-14 | Clostridiaceae_4 |
| 462 | 22.57 | -7.98 | 1.91 | -4.18 | 2.89E-05 | 0.000422537 | Microtrichaceae |
| 465 | 16.56 | 7.53 | 1.46 | 5.16 | 2.52E-07 | 5.96E-06 | Rhodobacteraceae |
| 485 | 15.35 | 7.42 | 2.05 | 3.63 | 0.000287644 | 0.002905203 | Kiloniellaceae |
| 488 | 9.86 | -6.79 | 2.02 | -3.37 | 0.000756216 | 0.006462737 | Phormidesmiaceae |
| 496 | 13.93 | 7.28 | 2.05 | 3.56 | 0.000371235 | 0.003555535 | Woeseiaceae |
| 497 | 15.94 | 7.48 | 1.86 | 4.02 | 5.93E-05 | 0.000774611 | Geminicoccaceae |
| 506 | 14.39 | 7.33 | 1.64 | 4.47 | 7.68E-06 | 0.000127372 | Rhizobiaceae |
| 517 | 6.70 | -6.24 | 1.88 | -3.31 | 0.000919763 | 0.007298974 | Pirellulaceae |
| 525 | 10.30 | 6.84 | 2.07 | 3.30 | 0.000971251 | 0.00759901 | Actinomarinales NA |
| 527 | 16.14 | 7.49 | 2.07 | 3.61 | 0.000304277 | 0.003045511 | Nitrincolaceae |
| 528 | 13.32 | 7.22 | 2.04 | 3.53 | 0.000410555 | 0.003833 | NB1-j NA |
| 571 | 11.86 | 7.05 | 1.82 | 3.87 | 0.000107109 | 0.001307668 | Woeseiaceae |
| 574 | 11.44 | 7.00 | 1.84 | 3.81 | 0.00014167 | 0.001639538 | Flavobacteriaceae |
| 638 | 13.62 | -7.25 | 2.26 | -3.20 | 0.001352746 | 0.009973941 | Tenderiaceae |
| 655 | 10.11 | 6.82 | 1.87 | 3.65 | 0.000258522 | 0.002735413 | Pirellulaceae |
| 659 | 8.77 | 6.61 | 2.03 | 3.26 | 0.001115163 | 0.008485931 | Cellvibrionaceae |
| 698 | 8.93 | 6.64 | 1.86 | 3.58 | 0.000347803 | 0.003389555 | Cellvibrionaceae |
| 711 | 6.74 | 6.24 | 1.50 | 4.16 | 3.21E-05 | 0.000462598 | Puniceicoccaceae |
| 716 | 10.82 | -6.92 | 1.69 | -4.09 | 4.39E-05 | 0.000588074 | Rhizobiaceae |
| 717 | 7.48 | 6.39 | 1.83 | 3.49 | 0.000487019 | 0.004435068 | Rhodobacteraceae |
| 720 | 9.48 | 6.73 | 2.05 | 3.28 | 0.001027516 | 0.007983009 | Methyloligellaceae |
| 725 | 9.36 | 6.71 | 1.84 | 3.64 | 0.000270107 | 0.002804567 | Pirellulaceae |
| 728 | 10.35 | 6.85 | 1.85 | 3.70 | 0.000216748 | 0.002384224 | Cyclobacteriaceae |
| 730 | 8.60 | 6.59 | 1.87 | 3.53 | 0.000414157 | 0.003834407 | Parvularculaceae |
| 734 | 9.39 | 6.71 | 1.67 | 4.02 | 5.85E-05 | 0.000773556 | Methyloligellaceae |
| 764 | 7.69 | 6.43 | 1.92 | 3.34 | 0.000825867 | 0.006746602 | Rhodopirillaceae |
| 858 | 6.27 | 6.13 | 1.84 | 3.34 | 0.000838867 | 0.006802781 | Kangiellaceae |
| 903 | 6.75 | 5.19 | 1.62 | 3.20 | 0.001356657 | 0.009973941 | Kiloniellaceae |
| 927 | 6.80 | 6.25 | 1.85 | 3.37 | 0.000742039 | 0.006440667 | Alphaproteobacteria NA |
| 960 | 5.30 | 5.89 | 1.83 | 3.21 | 0.00131734 | 0.009822583 | Phycisphaeraceae |

Table S8. Output of the differently abundance analysis carried out with DESeq2 analyses between bacteria ASVs associated with the two *L. stictiforme* clades, 3B and C3 (adjusted *p*-value  ≤ 0.01).

| ASV | baseMean | log2FoldChange | lfcSE | stat | pvalue | padj | Family |
| --- | --- | --- | --- | --- | --- | --- | --- |
| 1 | 1696.77 | -26.72 | 3.42 | -7.80 | 6.06E-15 | 2.80E-12 | Spongiibacteraceae |
| 9 | 609.42 | -25.39 | 3.43 | -7.39 | 1.43E-13 | 3.30E-11 | Gammaproteobacteria NA |
| 20 | 393.33 | -24.79 | 3.43 | -7.22 | 5.27E-13 | 8.09E-11 | Prochloraceae |
| 23 | 20.07 | -20.75 | 3.43 | -6.05 | 1.49E-09 | 5.73E-08 | Pirellulaceae |
| 27 | 205.63 | -9.93 | 2.33 | -4.27 | 1.98E-05 | 0.000456453 | Rubritaleaceae |
| 47 | 454.57 | 13.10 | 2.68 | 4.89 | 1.03E-06 | 2.50E-05 | Geminicoccaceae |
| 55 | 123.10 | -9.19 | 2.37 | -3.88 | 0.000105369 | 0.00231309 | Rubritaleaceae |
| 81 | 17.26 | -20.55 | 3.44 | -5.98 | 2.24E-09 | 7.93E-08 | Geminicoccaceae |
| 82 | 135.92 | -9.34 | 2.67 | -3.50 | 0.000465566 | 0.008585037 | Phormidiaceae |
| 117 | 111.84 | -22.99 | 3.43 | -6.69 | 2.18E-11 | 2.01E-09 | SAR116_clade |
| 133 | 57.93 | -8.11 | 2.20 | -3.69 | 0.00022422 | 0.004494158 | Microtrichaceae |
| 174 | 43.96 | -21.81 | 3.43 | -6.35 | 2.16E-10 | 1.10E-08 | Rhizobiaceae |
| 187 | 49.79 | -7.89 | 2.16 | -3.65 | 0.000262856 | 0.005049033 | WN-HWB-116 NA |
| 212 | 127.69 | 11.27 | 3.03 | 3.72 | 0.000200058 | 0.004192119 | Geminicoccaceae |
| 292 | 50.95 | -22.01 | 3.43 | -6.41 | 1.48E-10 | 8.56E-09 | Rhizobiales NA |
| 311 | 38.28 | -21.62 | 3.22 | -6.72 | 1.78E-11 | 2.01E-09 | DEV007 |
| 456 | 29.39 | -21.27 | 3.44 | -6.19 | 5.97E-10 | 2.50E-08 | Rhizobiales NA |
| 464 | 32.52 | -21.41 | 3.44 | -6.23 | 4.61E-10 | 2.13E-08 | Rhizobiales NA |
| 477 | 9.99 | -19.82 | 3.44 | -5.77 | 8.15E-09 | 2.09E-07 | Caldilineaceae |
| 484 | 14.68 | -20.33 | 3.44 | -5.92 | 3.27E-09 | 1.02E-07 | Rhodobacteraceae |
| 602 | 22.11 | -20.32 | 3.44 | -5.92 | 3.32E-09 | 1.02E-07 | Shewanellaceae |
| 629 | 11.77 | -20.04 | 3.44 | -5.83 | 5.54E-09 | 1.60E-07 | pItb-vmat-80 NA |
| 686 | 25.34 | 22.06 | 3.33 | 6.62 | 3.67E-11 | 2.42E-09 | Microtrichaceae |
| 876 | 11.81 | 22.13 | 3.34 | 6.63 | 3.30E-11 | 2.42E-09 | Desulfobulbaceae |
| 967 | 10.29 | -19.85 | 3.44 | -5.78 | 7.66E-09 | 2.08E-07 | Rhizobiales NA |
